# Supplementary material for: AncesTree: An interactive immunoglobulin lineage tree visualizer
Source: PubMed Central journal article supplement (PMC7375605; doi:10.1371/journal.pcbi.1007731), 2020-07-10
Supplement: pcbi.1007731.s001.pdf [file pcbi.1007731.s001.pdf]

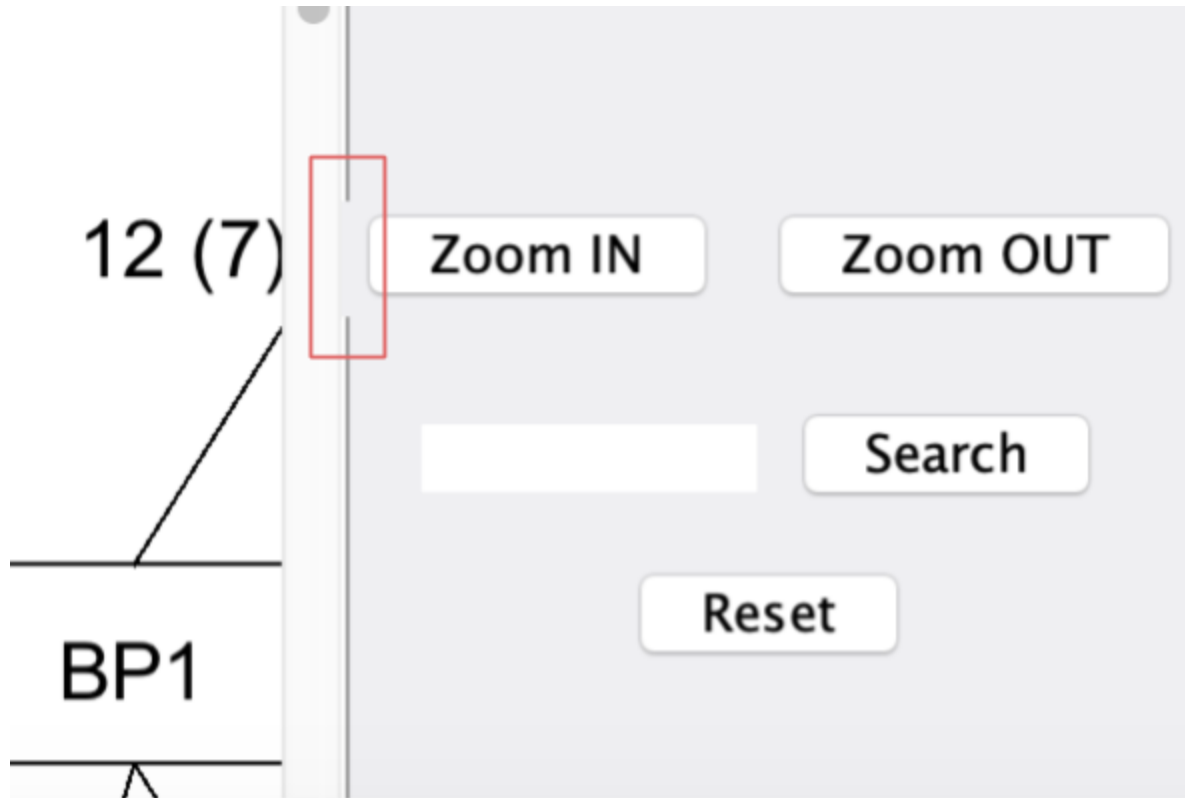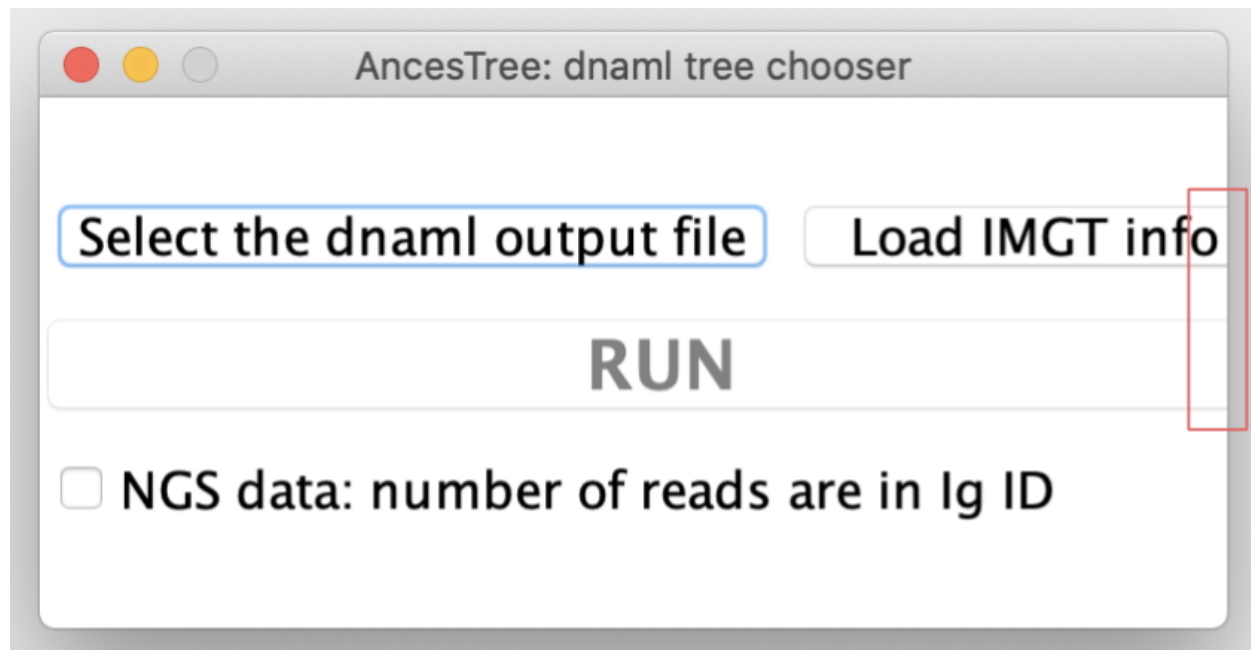

Amino acid sequence:

QVQLVQSGAEIKKPGSSVKVSCRASGTTFRSFAISWVRQA  
PGQGLEYMGGVIALFGTANYAQKFQGRVTITADESTNTAY  
MELSSLRSEDTAIVYYCAKGSYHVRDYFDYWGGTLTVS  
S

EC 50 (ng/ml):

*Enter the EC 50 here*

Comment 1

 Show

Comment 2
